# Supplementary material for: High-precision rapid testing of omicron SARS-CoV-2 variants in clinical samples using AI-nanopore
Source: Royal Society of Chemistry journal article supplement (doi:10.1039/d3lc00572k), 2023-01-01
Supplement: d3lc00572k1.pdf [file d3lc00572k1.pdf]

## Supplementary Information

### High-Precision Rapid Testing of Omicron SARS-CoV-2 Variants in Clinical Samples Using AI-Nanopore

Kaoru Murakami<sup>1,2</sup>, Shimpei Kubota<sup>1,2</sup>, Kumiko Tanaka<sup>1</sup>, Keiichiroh Akabane<sup>1</sup>, Rigel Suzuki<sup>3</sup>, Yuta Shinohara<sup>1</sup>, Hiroyasu Takei<sup>4</sup>, Shigeru Hashimoto<sup>1</sup>, Yuki Tanaka<sup>2</sup>, Shintaro Hojyo<sup>1,2</sup>, Osamu Sakamoto<sup>4</sup>, Norihiko Naono<sup>4</sup>, Takayui Takaai<sup>5</sup>, Kazuki Sato<sup>1,6</sup>, Yuichi Kojima<sup>1,6</sup>, Toshiyuki Harada<sup>7</sup>, Takeshi Hattori<sup>8</sup>, Satoshi Fuke<sup>9</sup>, Isao Yokota<sup>10</sup>, Satoshi Konno<sup>6</sup>, Takashi Washio<sup>5</sup>, Takasuke Fukuhara<sup>3</sup>, Takanori Teshima<sup>11</sup>, Masateru Taniguchi<sup>5\*</sup>, and Masaaki Murakami<sup>1,2,12,13\*</sup>

The Supplementary Information includes:

**Table S1** Classifiers used in machine learning.

**Table S2** Number of waveforms obtained from six coronavirus variants and negative control.

**Table S3** Top5 classifiers that contribute to the high *F*-measures.

**Table S4** Number of waveforms obtained from three coronavirus samples and used in machine learning.

**Table S5** Number of waveforms obtained from clinical specimens and used in machine learning.

**Table S6** Top 20 features used in machine learning for clinical specimens.

**Table S7** PCR results and Ct values of clinical specimens.

**Figure S1** Histograms of height ( $I_p$ ), steps ( $t_d$ ), and peak position ratios for six cultured coronaviruses.

**Figure S2** Interference light microscopy (VideoDrop) analysis of control medium.

**Figure S3** Positive unlabelled classifier.

**Figure S4** Features used in machine learning.

**Figure S5** Machine learning algorithm implemented on cultured coronaviruses.

**Figure S6** Algorithm of PUC.

**Figure S7** Confusion matrixes for comparisons of two types of cultured SARS-CoV-2 variants.

**Figure S8** Confusion matrixes for comparisons of three types of cultured SARS-CoV-2 variants.

**Figure S9** Confusion matrixes for comparisons of four types of cultured SARS-CoV-2 variants.

**Figure S10** Confusion matrixes for comparisons of five types of cultured SARS-CoV-2 variants.

**Figure S11** Ionic current-time profiles obtained for Wuhan-type SARS-CoV-2 with  $\delta$ - and o-type spike proteins.

**Figure S12** Ionic current-time profiles obtained from clinical specimens.

**Figure S13** Flowchart of machine learning of clinical specimens.

**Figure S14** Detailed algorithm of the learning process of clinical specimens.

**Figure S15** Detailed algorithm of the diagnosis process of clinical specimens.

**Figure S16** Analysis procedure for the  $C_t$  dependence of the  $F$ -measures, sensitivity, and specificity.

**Figure S17** Isoelectric points of S-proteins on different coronaviruses.

**Figure S18** Electrostatic potentials of S-proteins on different coronaviruses.

**Table S1** Number of waveforms obtained from six variants and negative control.

| <b>Virus</b> | <b>Number of nanopores in<br/>the measurements</b> | <b>Number of extracted<br/>waveforms</b> |
|--------------|----------------------------------------------------|------------------------------------------|
| Wuhan        | 2                                                  | 8308                                     |
| $\alpha$     | 5                                                  | 3028                                     |
| $\beta$      | 3                                                  | 3274                                     |
| $\gamma$     | 6                                                  | 2967                                     |
| $\delta$     | 6                                                  | 3174                                     |
| $\omicron$   | 3                                                  | 11385                                    |
| NTC          | 11                                                 | 3243                                     |

Pulses were extracted automatically using Aipore-ONE<sup>TM</sup> extraction software.

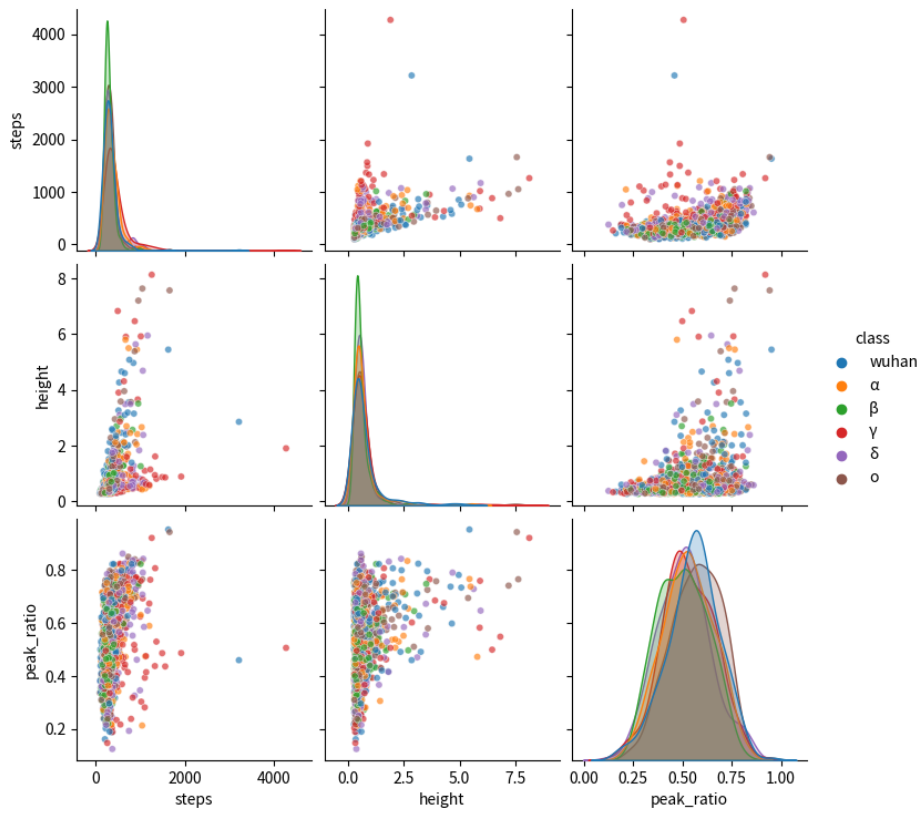

**Figure S1** Histograms of height ( $I_p$ ), steps ( $t_d$ ), and peak position ratios for six cultured coronaviruses.

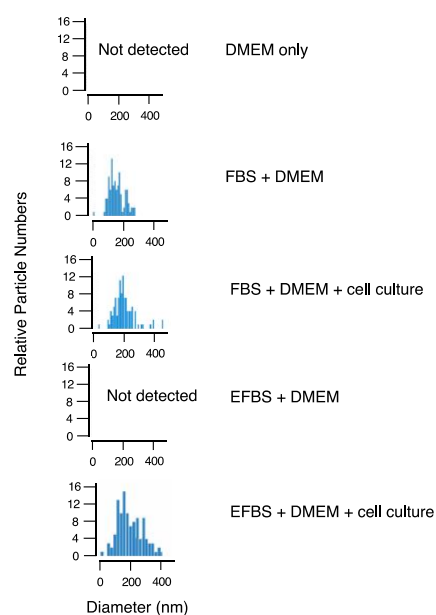

**Figure S2** Interference light microscopy (VideoDrop) analysis of control medium. Nanoparticles were detected in medium plus FBS (FBS + DMEM) but not in medium alone (DMEM only). A 48-h cell culture increased the number of bigger nanoparticles in FBS + DMEM + cell culture. No nanoparticles in medium plus exosome free-FBS (EFBS + DMEM) were detected, but the number of bigger nanoparticles appeared after a 48-h cell culture (EFBS + DMEM + cell culture).

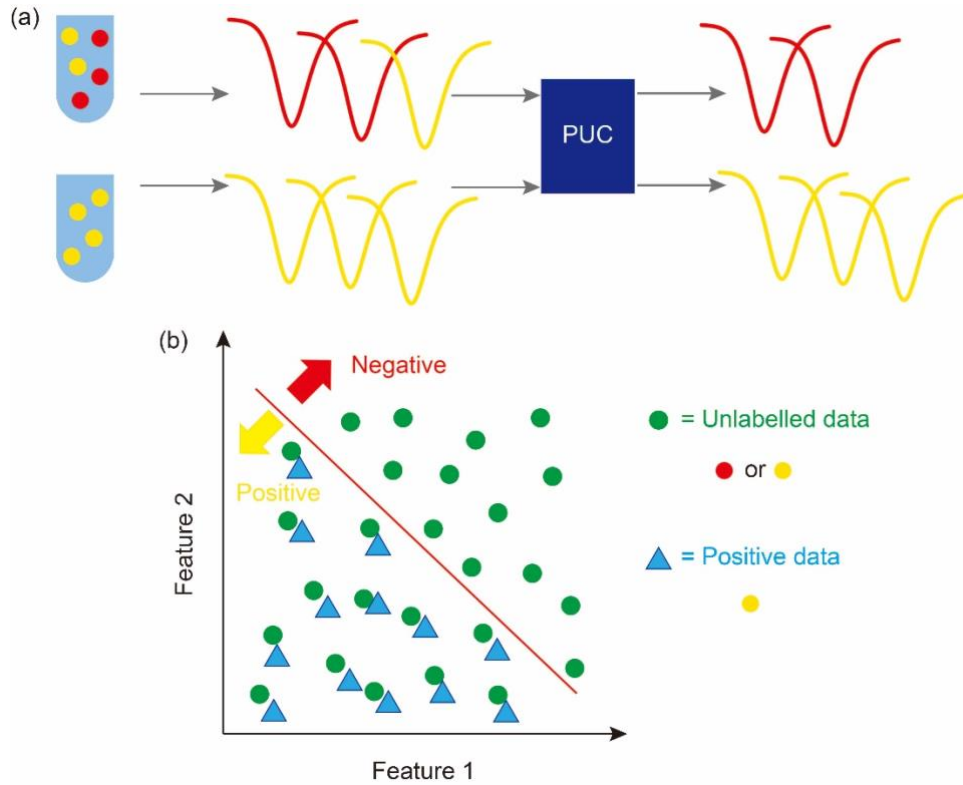

**Figure S3** Positive unlabelled classifier. (a) In a solution of cultured virus, virus (●) and exosomes (●) are present. In a culture supernatant, only exosomes (●) are present. The PUC extracts the viral waveform from the mixed viral and exosomal waveform. (b) A conceptual diagram of the PUC in a feature space. Exosome waveforms are defined as positive, and virus waveforms as negative. Waveforms obtained from cultured virus measurements are either viral or exosomal and therefore unlabelled. The data above and below the red line indicate viral and exosomal waveforms, respectively.

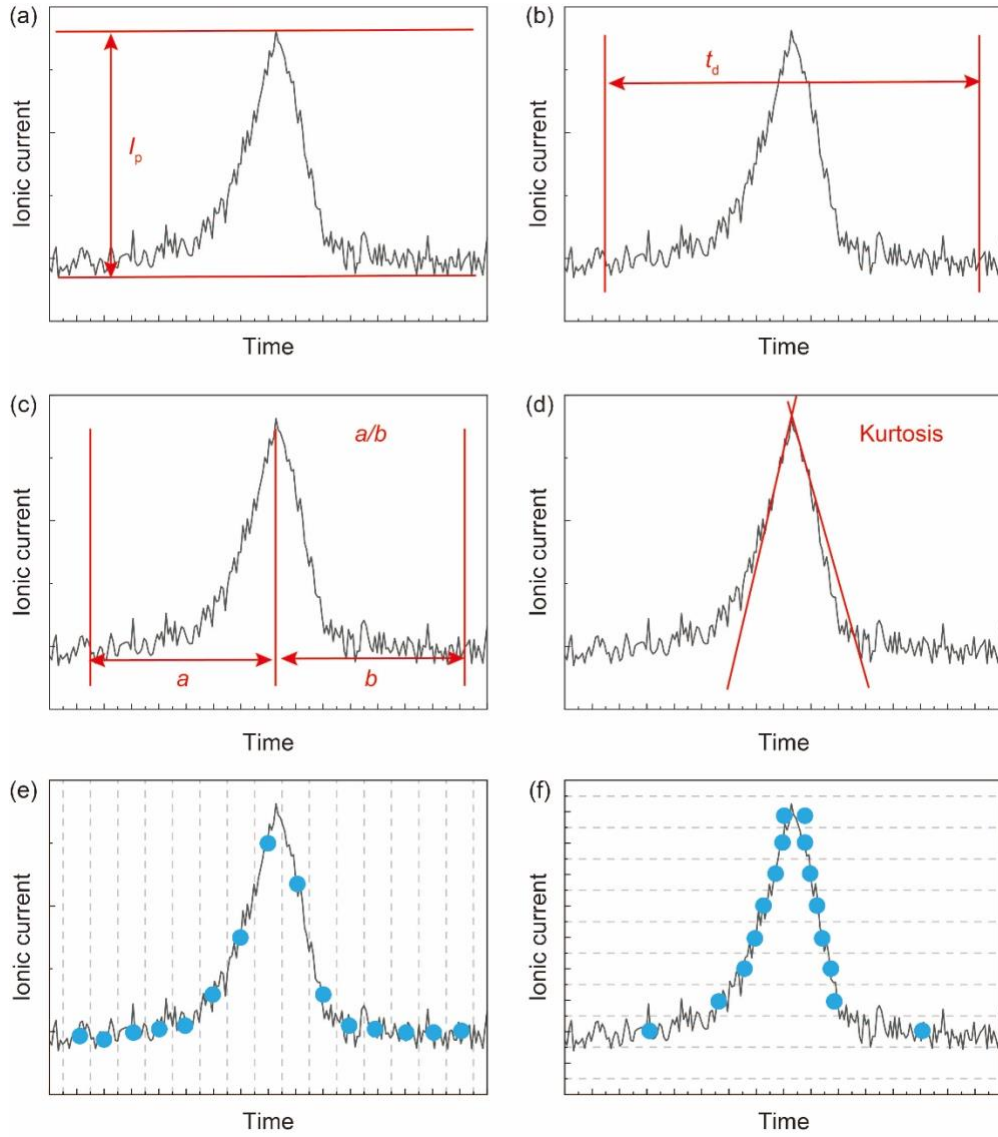

**Figure S4** Features used in machine learning. The (a) maximum current value and (b) current duration were defined as  $I_p$  and  $t_d$ , respectively. The (c) symmetry and (d) kurtosis of one ionic current-time waveform. The vector of one ionic current-time waveform that was divided into 10 equal parts in the (e) time and (f) current directions. These features and their combination patterns were used in the machine learning.

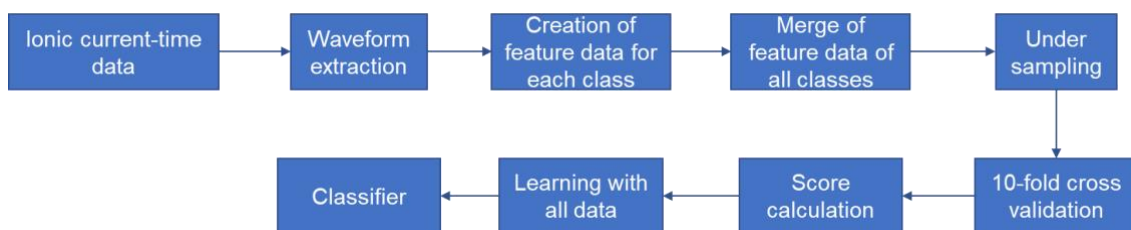

**Figure S5** Machine learning algorithm implemented on cultured coronaviruses. Each waveform was automatically extracted from the measured data using the waveform extraction software installed in Aipore-ONE™. The features of each cultured coronavirus were generated. The features of the six cultured viruses were merged. The number of waveforms for each coronavirus was adjusted to the minimum number of waveforms to avoid overfitting due to the nonuniform data volume. This method is an under-sampling method. Subsequently, the waveform data were randomly divided into 10 parts: 9 data groups were used for learning and 1 data group for testing. A 10-fold iteration was implemented, and the average score of the  $F$ -measure was calculated. To improve the accuracy, a machine learning procedure was performed using all the under-sampled waveforms. The classifier that afforded the highest  $F$ -measure was considered the most effective in identifying the cultured coronaviruses.



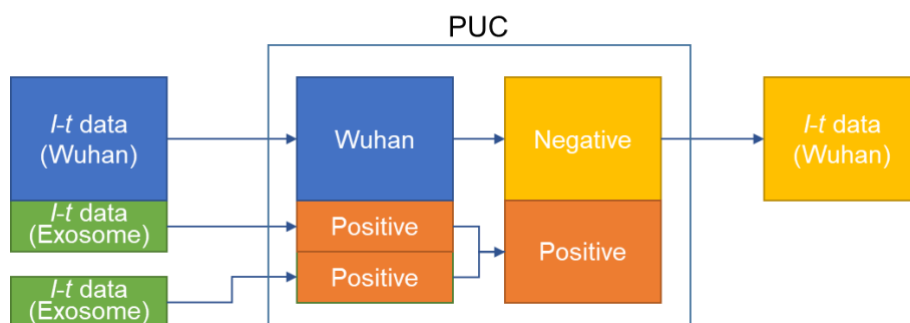

**Figure S6** Algorithm of PUC. The cultured Wuhan coronavirus solutions contained two types of particles: coronaviruses and exosomes. The culture medium contained exosomes only. The waveform of the exosomes was learned by learning the ionic current–time waveform of the culture medium. By learning the ionic current–time waveform of the cultured Wuhan coronavirus with PUC, the waveform was classified into the virus waveform and the exosome waveform.

**Table S2** Classifiers used in machine learning.

| No. | Classifier                                                                          |
|-----|-------------------------------------------------------------------------------------|
| 1   | naive_bayes.BernoulliNB                                                             |
| 2   | tree.DecisionTreeClassifier                                                         |
| 3   | tree.ExtraTreeClassifier                                                            |
| 4   | ensemble.ExtraTreesClassifier                                                       |
| 5   | naive_bayes.GaussianNB                                                              |
| 6   | neighbors.KNeighborsClassifier                                                      |
| 7   | semi_supervised.LabelPropagation                                                    |
| 8   | semi_supervised.LabelSpreading                                                      |
| 9   | discriminant_analysis.LinearDiscriminantAnalysis                                    |
| 10  | discriminant_analysis.QuadraticDiscriminantAnalysis                                 |
| 11  | svm.LinearSVC (setting multi_class="crammer_singer")                                |
| 12  | svm.LinearSVC (setting multi_class="ovr")                                           |
| 13  | linear_model.LogisticRegression (setting multi_class="multinomial")                 |
| 14  | linear_model.LogisticRegressionCV (setting multi_class="multinomial")               |
| 15  | linear_model.LogisticRegression (setting multi_class="ovr")                         |
| 16  | linear_model.LogisticRegressionCV (setting multi_class="ovr")                       |
| 17  | neural_network.MLPClassifier                                                        |
| 18  | neighbors.NearestCentroid                                                           |
| 19  | neighbors.RadiusNeighborsClassifier                                                 |
| 20  | ensemble.RandomForestClassifier                                                     |
| 21  | linear_model.RidgeClassifier                                                        |
| 22  | linear_model.RidgeClassifierCV                                                      |
| 23  | svm.NuSVC                                                                           |
| 24  | svm.SVC.                                                                            |
| 25  | gaussian_process.GaussianProcessClassifier (setting multi_class =<br>"one_vs_one")  |
| 26  | gaussian_process.GaussianProcessClassifier (setting multi_class =<br>"one_vs_rest") |
| 27  | ensemble.GradientBoostingClassifier                                                 |
| 28  | linear_model.SGDClassifier                                                          |
| 29  | linear_model.Perceptron                                                             |
| 30  | linear_model.PassiveAggressiveClassifier                                            |
| 31  | Light Gradient Boosting Machine                                                     |
| 32  | eXtreme Gradient Boosting                                                           |

**Table S3** Top5 classifiers that contribute to the high  $F$ -measures.

| Rank | Classifier                         | $F$ -measure |
|------|------------------------------------|--------------|
| 1    | neural_network.MLP                 | 0.3489       |
| 2    | eXtreme Gradient Boosting          | 0.3334       |
| 3    | Light Gradient Boosting<br>Machine | 0.3333       |
| 4    | ensemble.RandomForest              | 0.3300       |
| 5    | svm.SVC (multi class)              | 0.3222       |

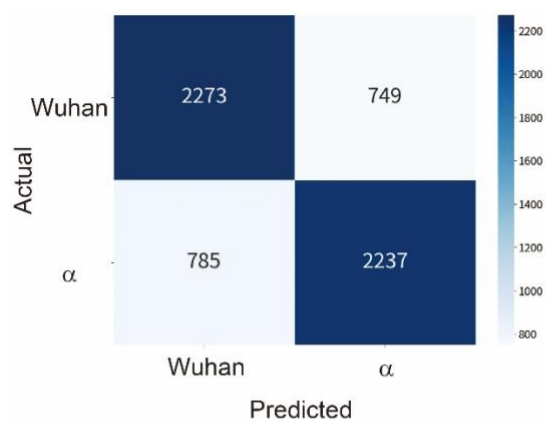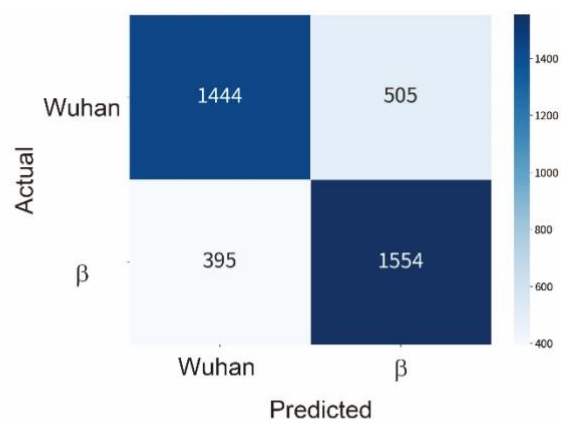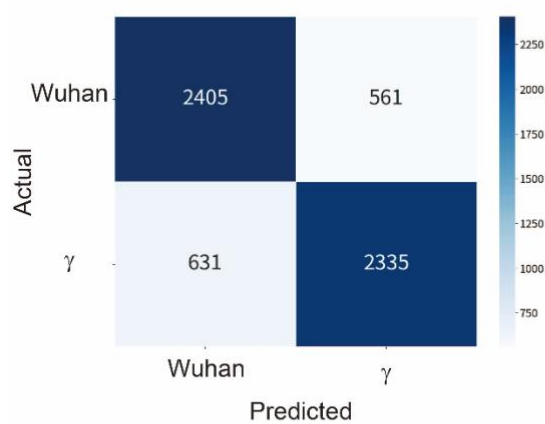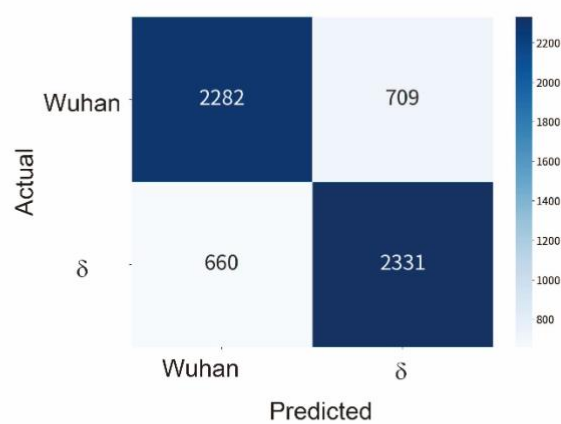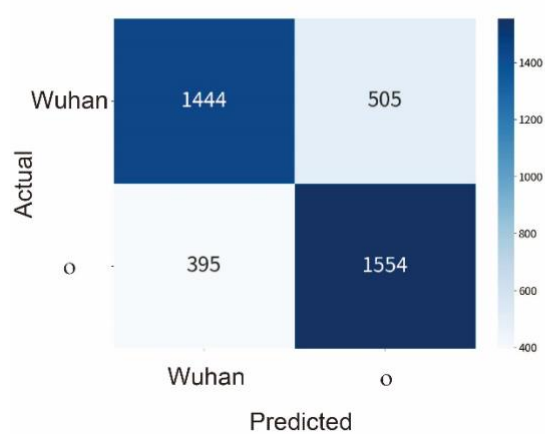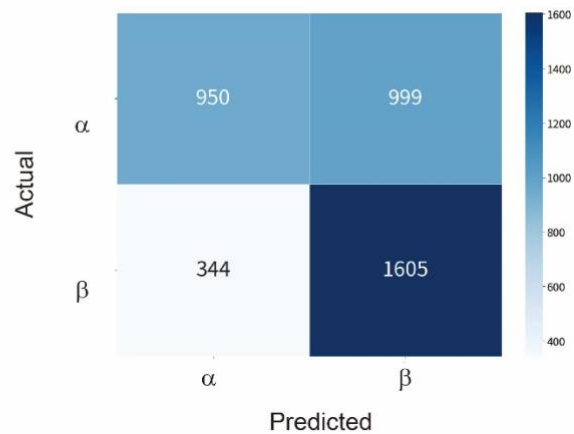

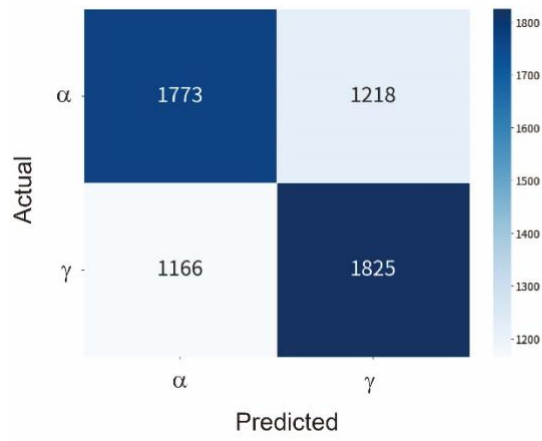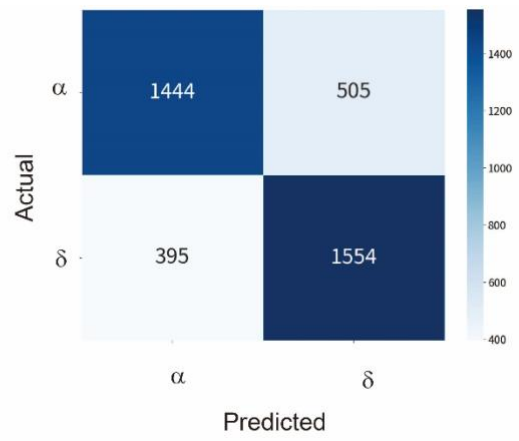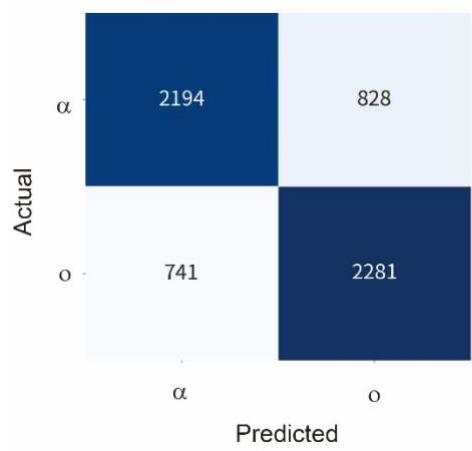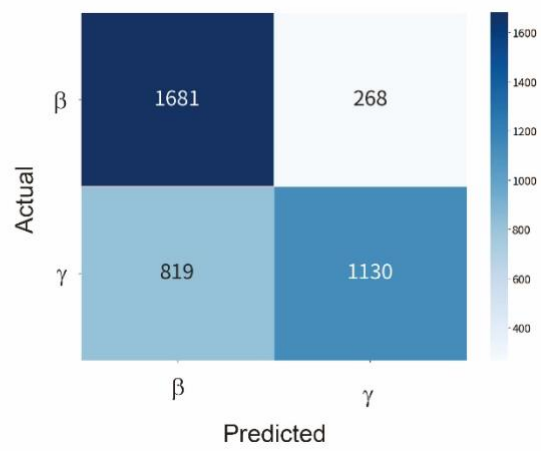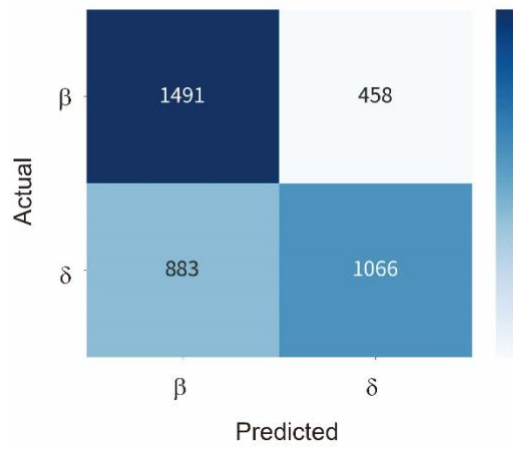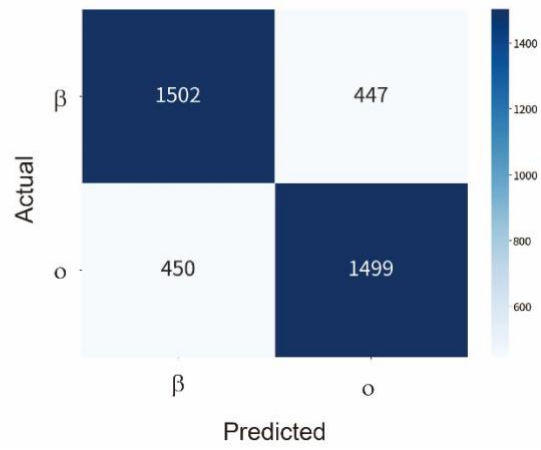

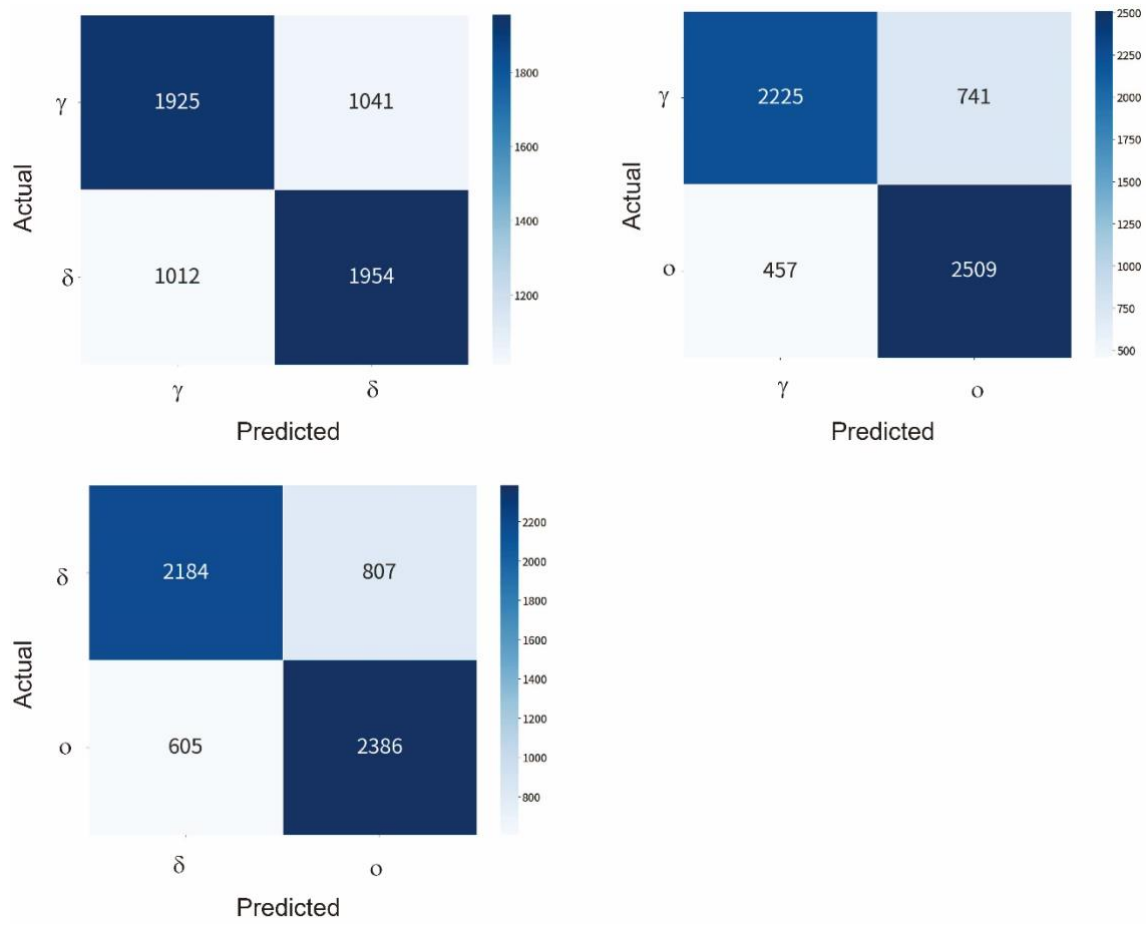

**Figure S7** Confusion matrixes for comparisons of two types of cultured SARS-CoV-2 variants. The number in each matrix element indicates the number of waveforms that were obtained by the measurements. The darker the color, the higher the identification accuracy. The  $F$ -measure was calculated from the confusion matrixes.

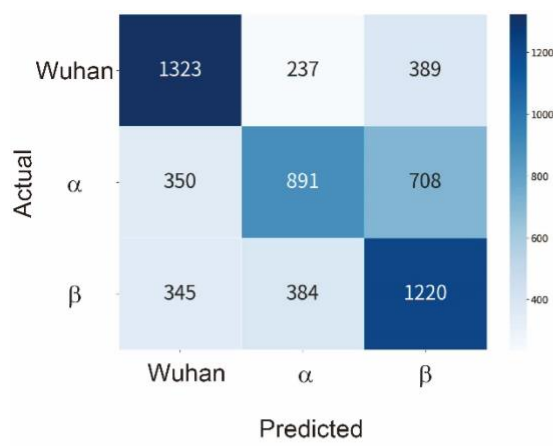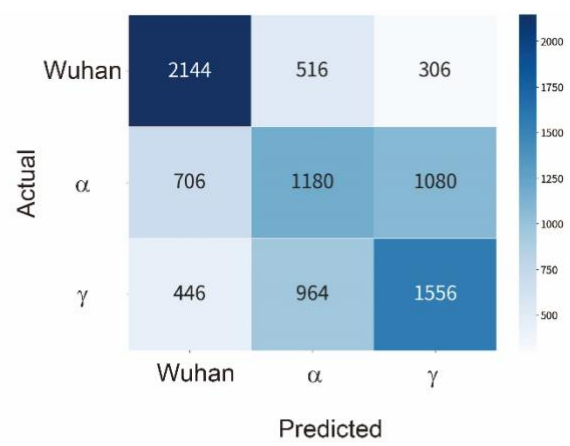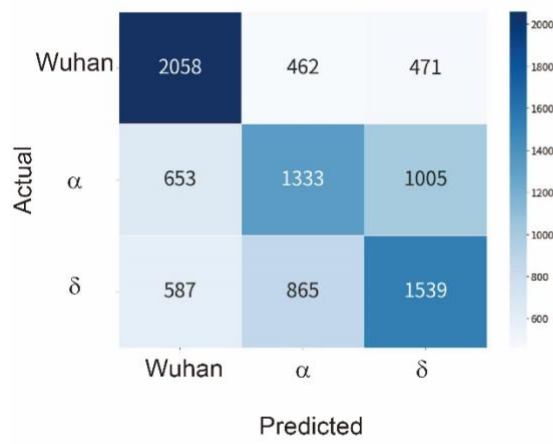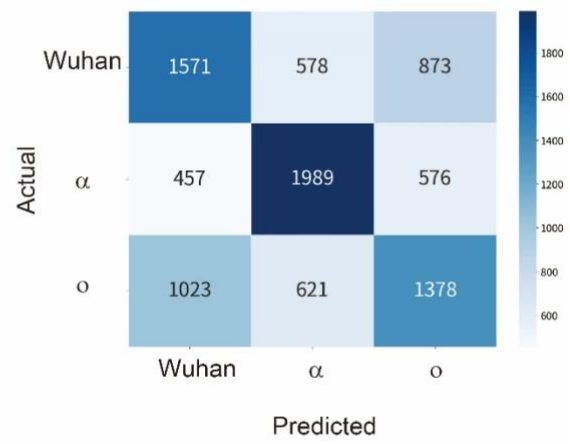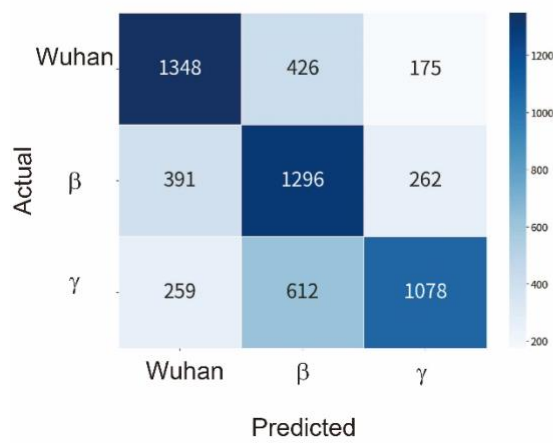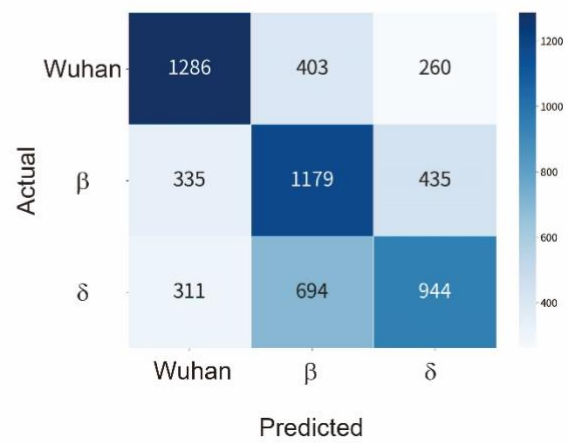

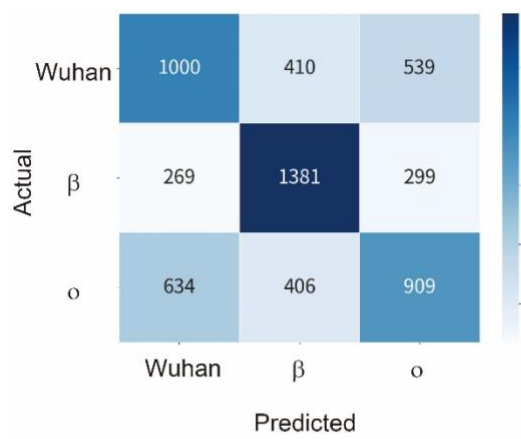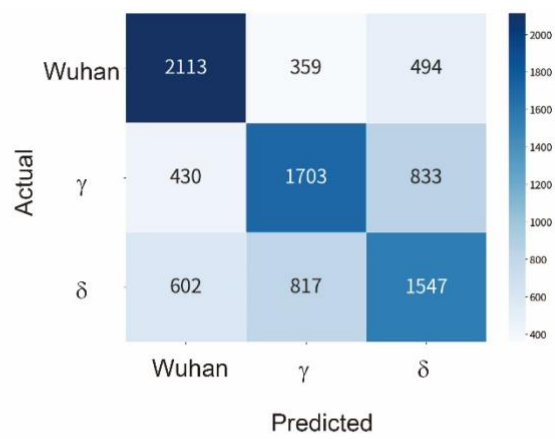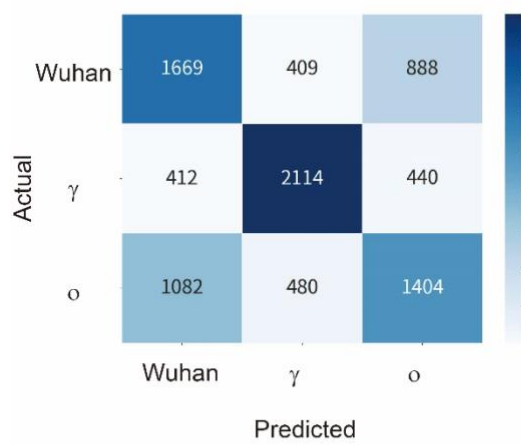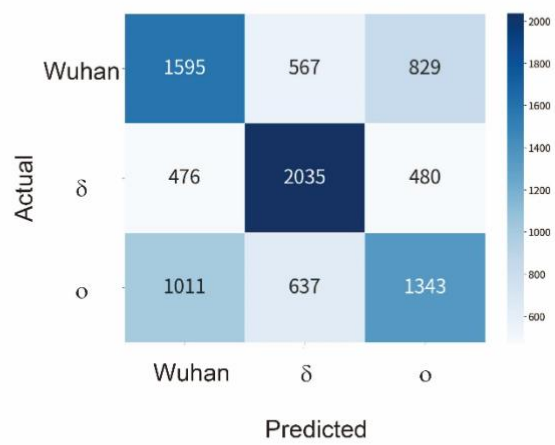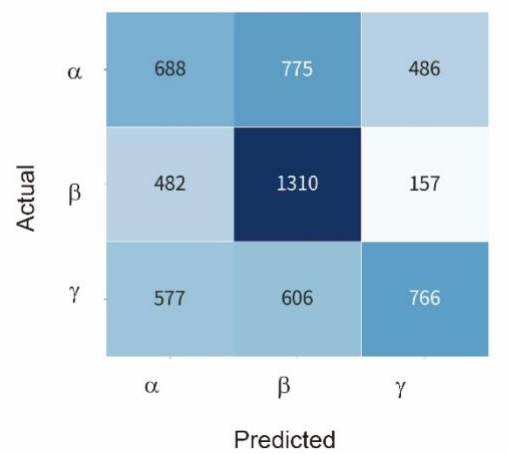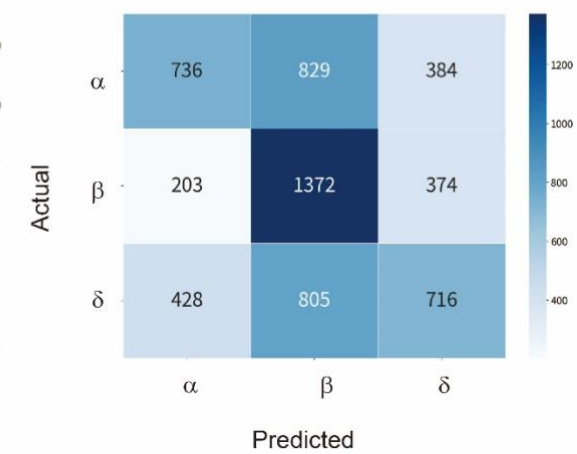



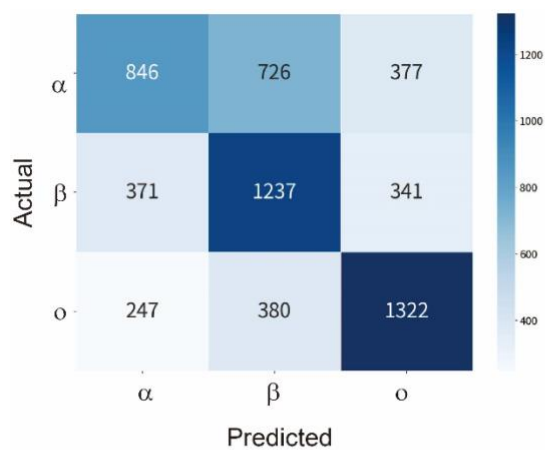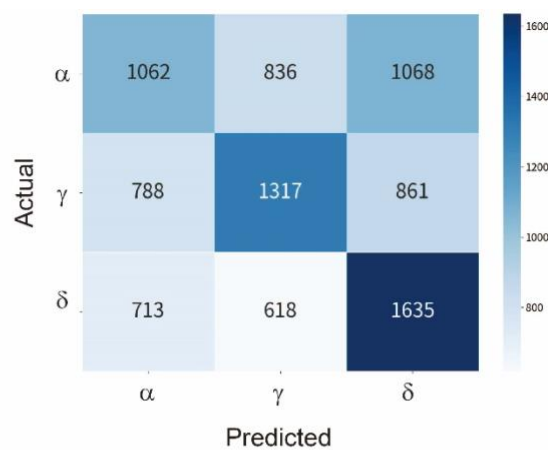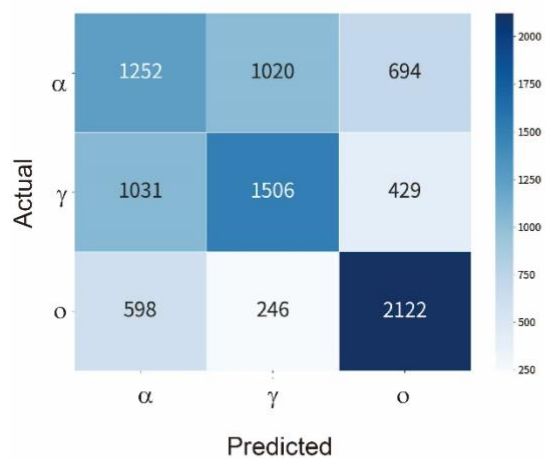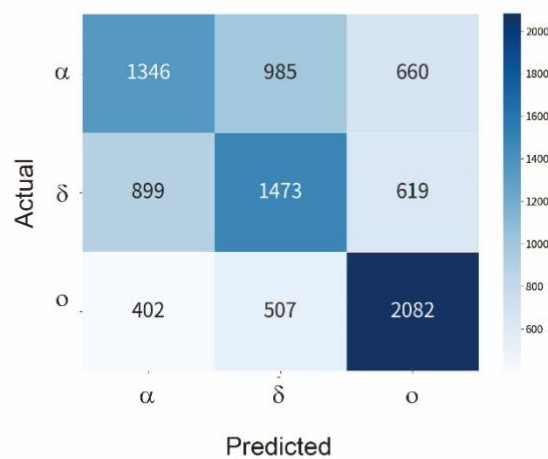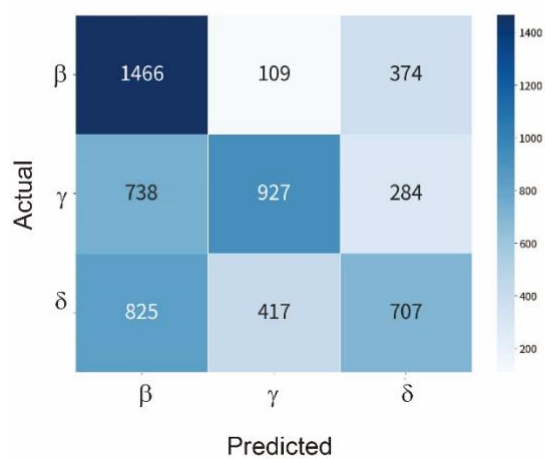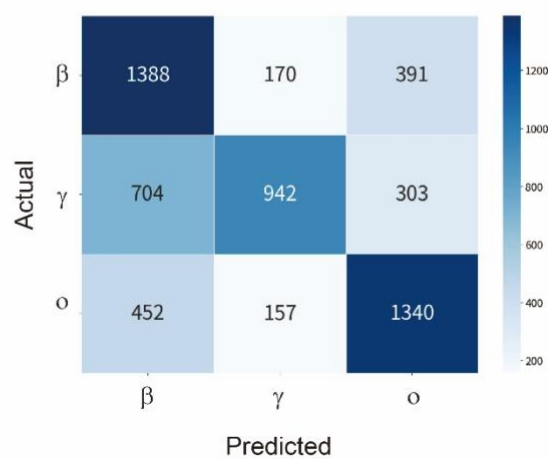

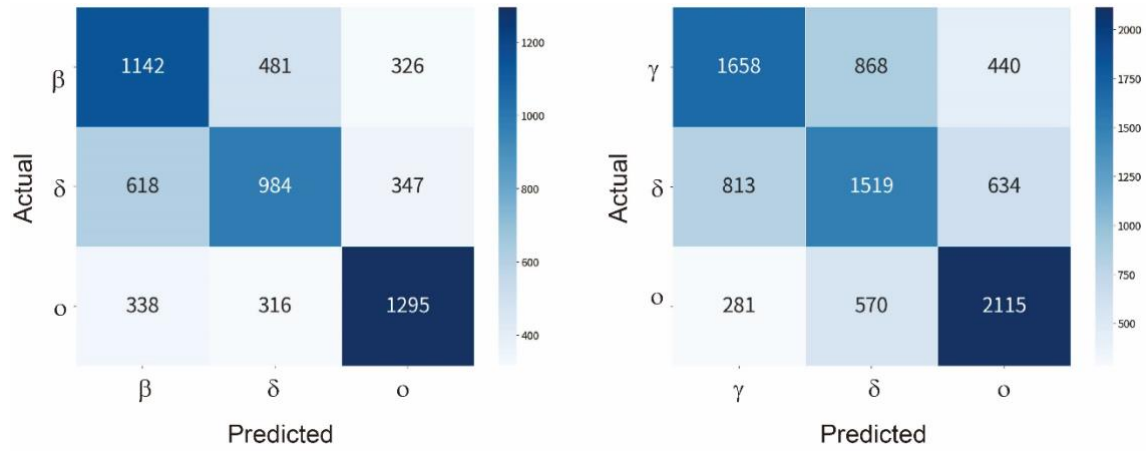

**Figure S8** Confusion matrixes for comparisons of three types of cultured SARS-CoV-2 variants. The number in each matrix element indicates the number of waveforms that were obtained by the measurements. The darker the color, the higher the identification accuracy. The  $F$ -measure was calculated from the confusion matrixes.

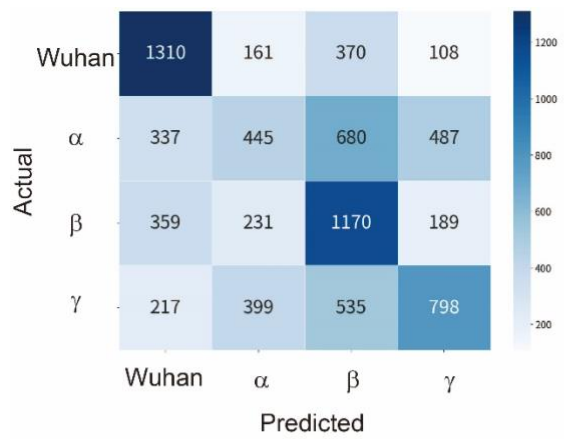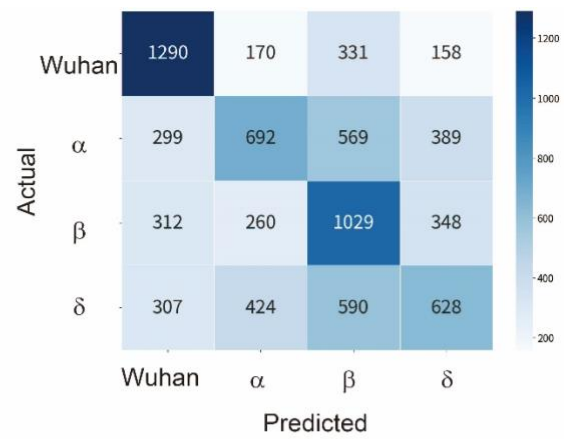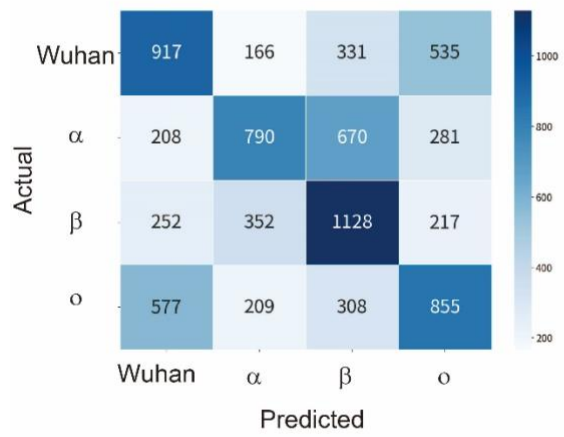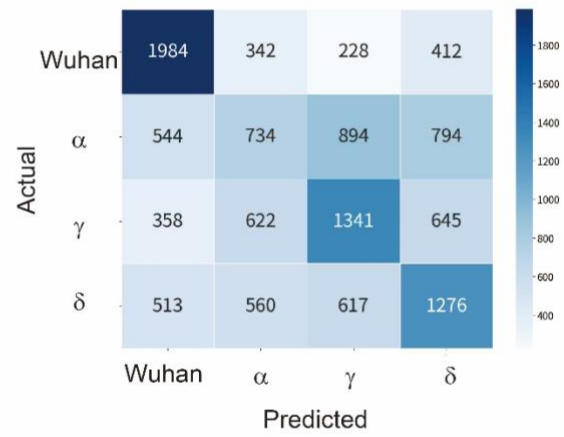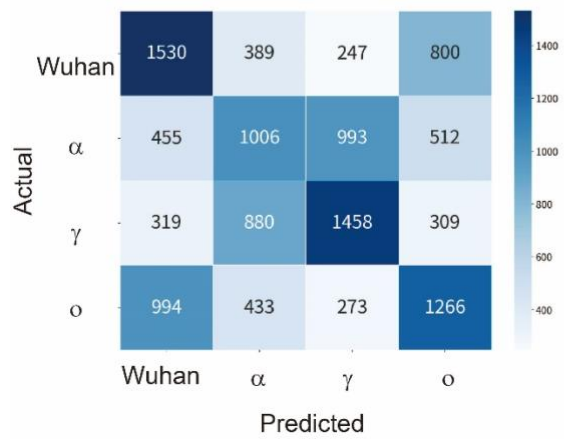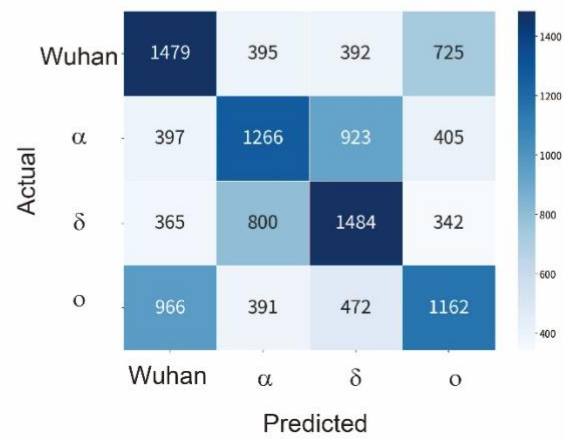

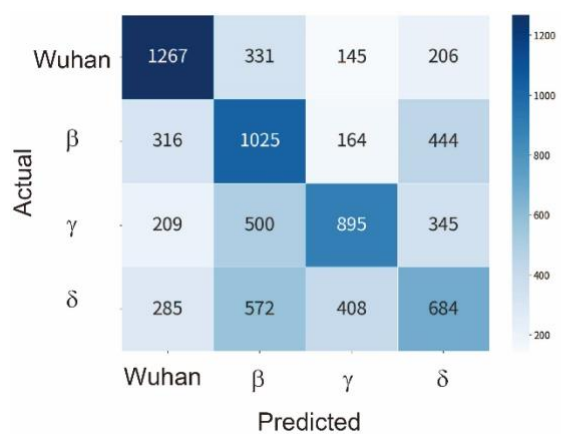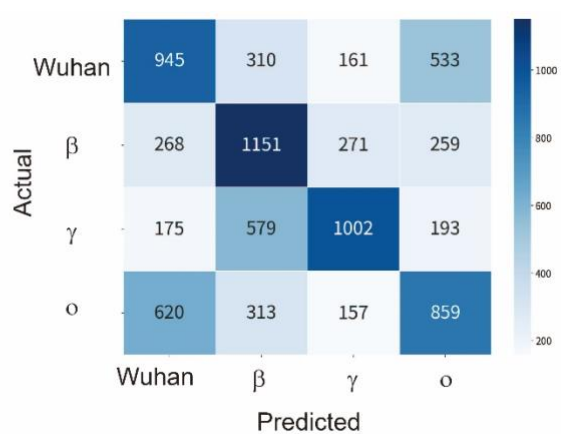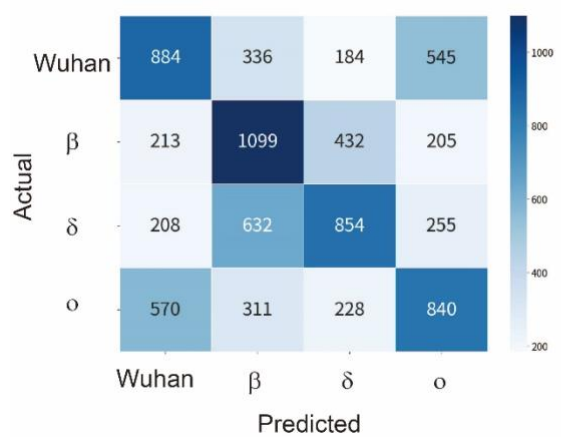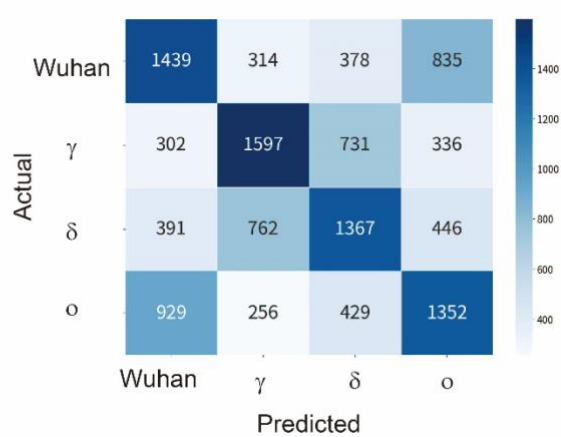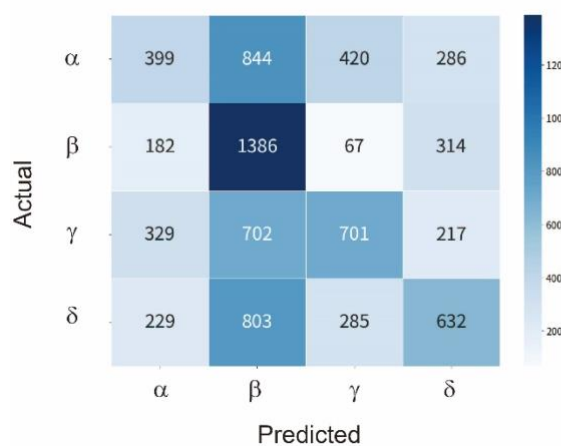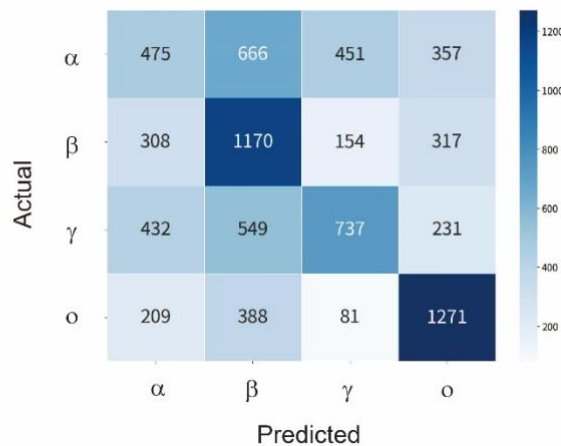

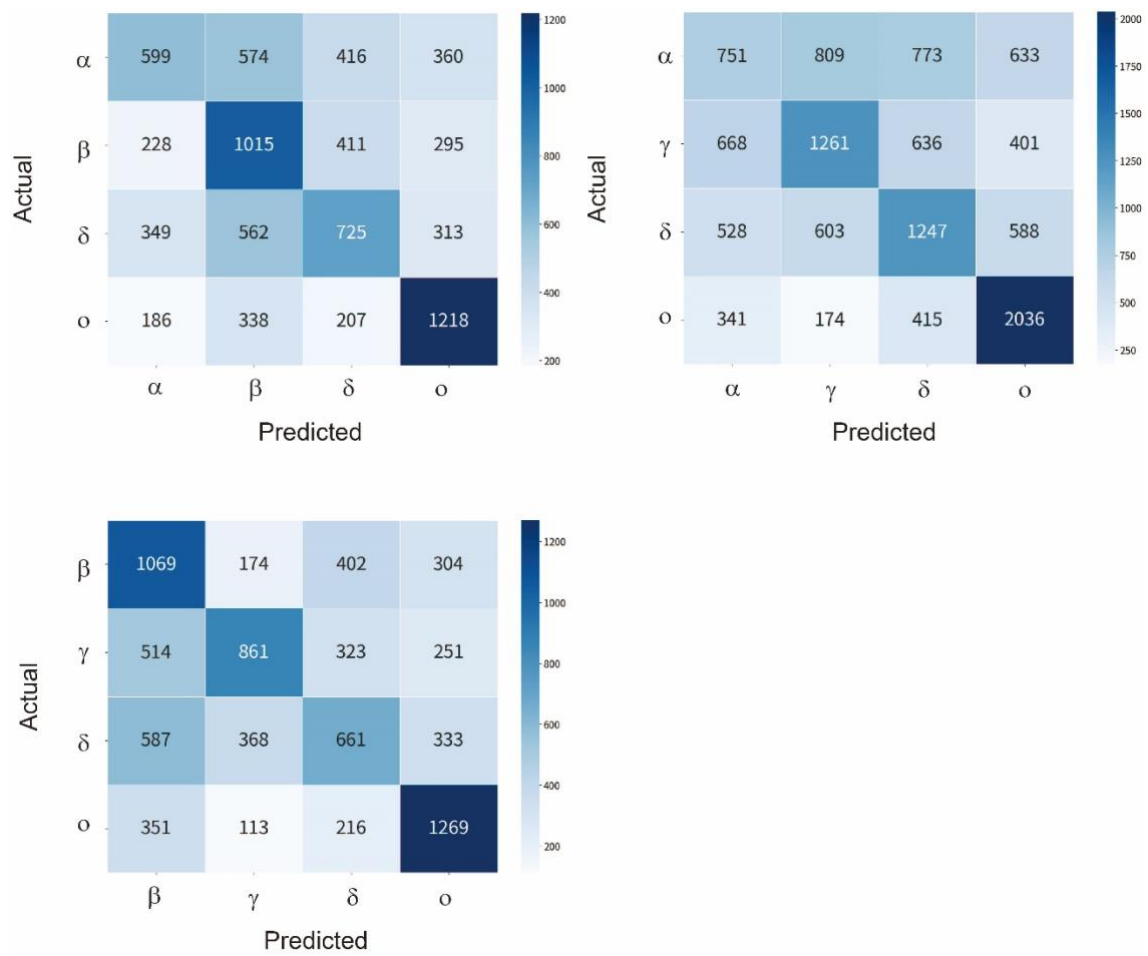

**Figure S9** Confusion matrixes for comparisons of four types of cultured SARS-CoV-2 variants. The number in each matrix element indicates the number of waveforms that were obtained by the measurements. The darker the color, the higher the identification accuracy. The  $F$ -measure was calculated from the confusion matrixes.

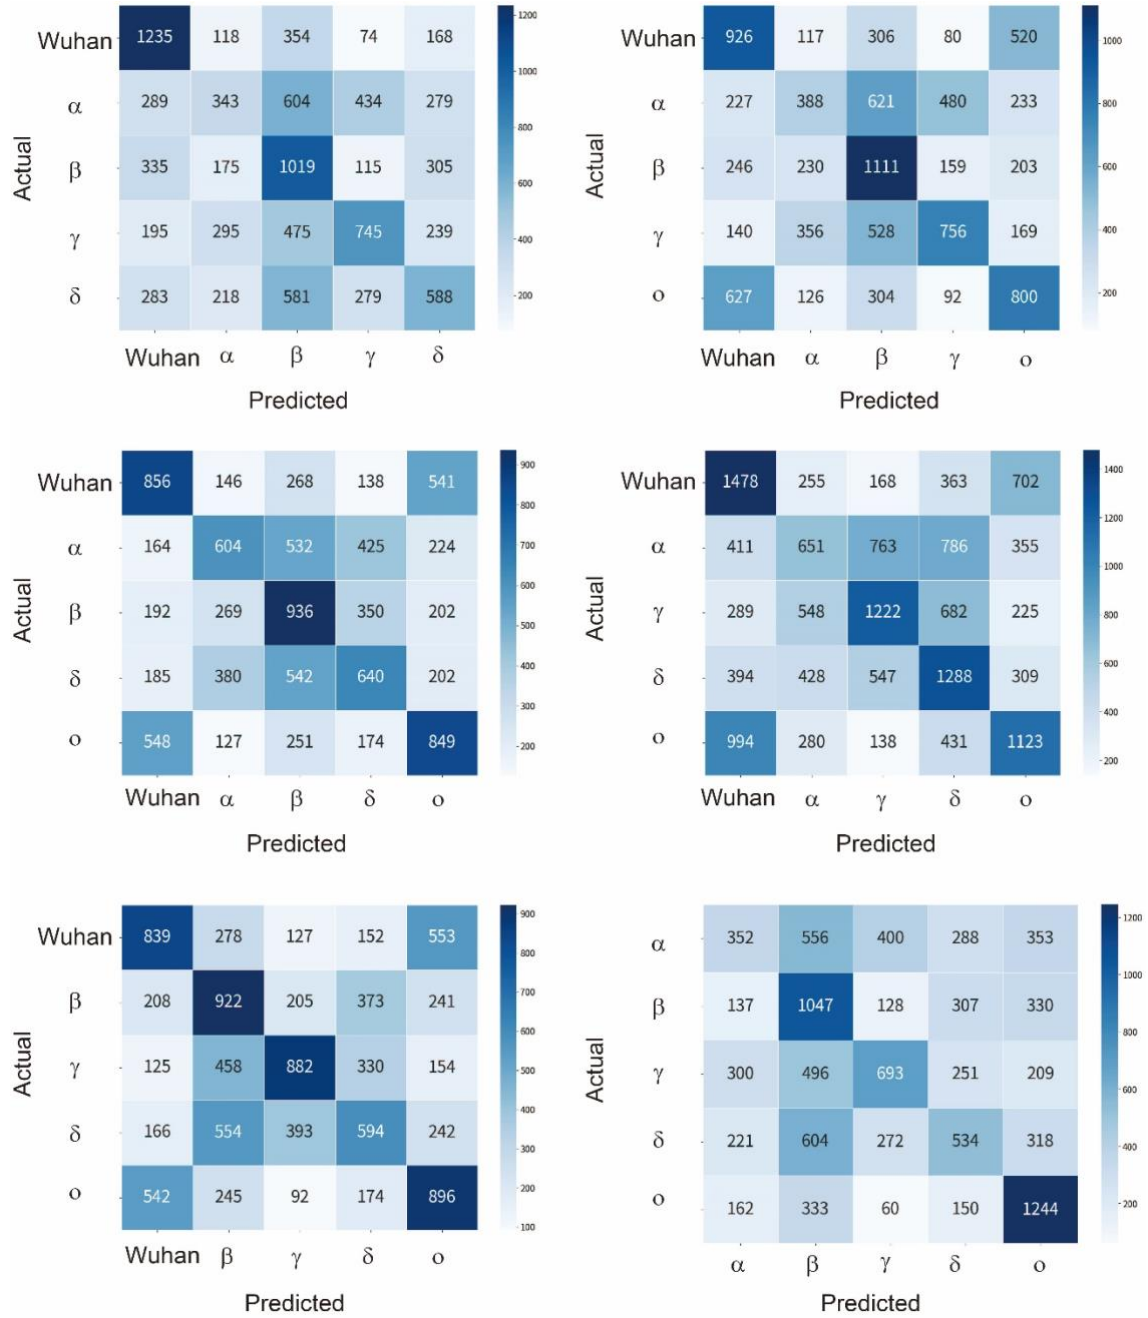

**Figure S10** Confusion matrixes for comparisons of five types of cultured SARS-CoV-2 variants. The number in each matrix element indicates the number of waveforms that were obtained by the measurements. The darker the color, the higher the identification accuracy. The  $F$ -measure was calculated from the confusion matrixes.

**Table S4** Number of waveforms obtained from three coronavirus samples and used in machine learning.

| <b>Virus</b>    | <b>Number of nanopores<br/>for measurements</b> | <b>Number of extracted<br/>waveforms</b> |
|-----------------|-------------------------------------------------|------------------------------------------|
| Wuhan           | 2                                               | 8308                                     |
| Wuhan- $\delta$ | 3                                               | 8216                                     |
| Wuhan- $\sigma$ | 3                                               | 9859                                     |

Pulses were extracted automatically using Aipore-ONE<sup>TM</sup> extraction software.

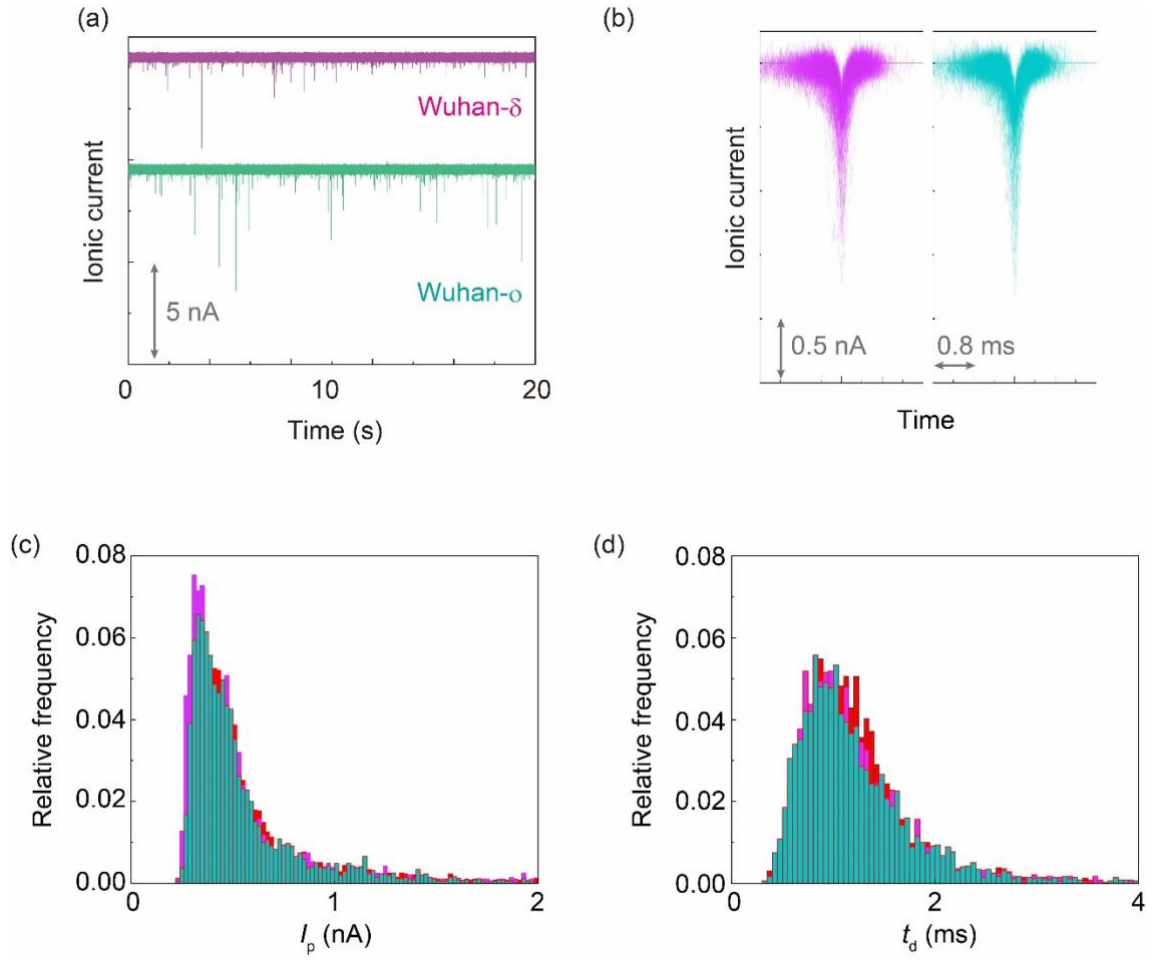

**Figure S11** Ionic current-time profiles obtained for Wuhan-type SARS-CoV-2 with  $\delta$ - and o-type spike proteins. (a) Ionic current-time profiles of Wuhan- $\delta$  and Wuhan-o viruses. (b) One hundred superimposed ionic current-time waveforms of the culture supernatant (Wuhan- $\delta$  and Wuhan-o). Histograms of the (c) maximum current value ( $I_p$ ) and (d) current duration ( $t_d$ ). Red, purple, and emerald green correspond to Wuhan, Wuhan- $\delta$ , and Wuhan-o, respectively.



**Table S5** Number of waveforms obtained from clinical specimens and used in machine learning.

| <b>Clinical specimen</b> | <b>Number of specimens for measurements</b> | <b>Number of extracted waveforms</b> |
|--------------------------|---------------------------------------------|--------------------------------------|
| PCR positive             | 132                                         | 99980                                |
| PCR negative             | 109                                         | 75701                                |

Pulses were extracted automatically using Aipore-ONE<sup>TM</sup> extraction software.

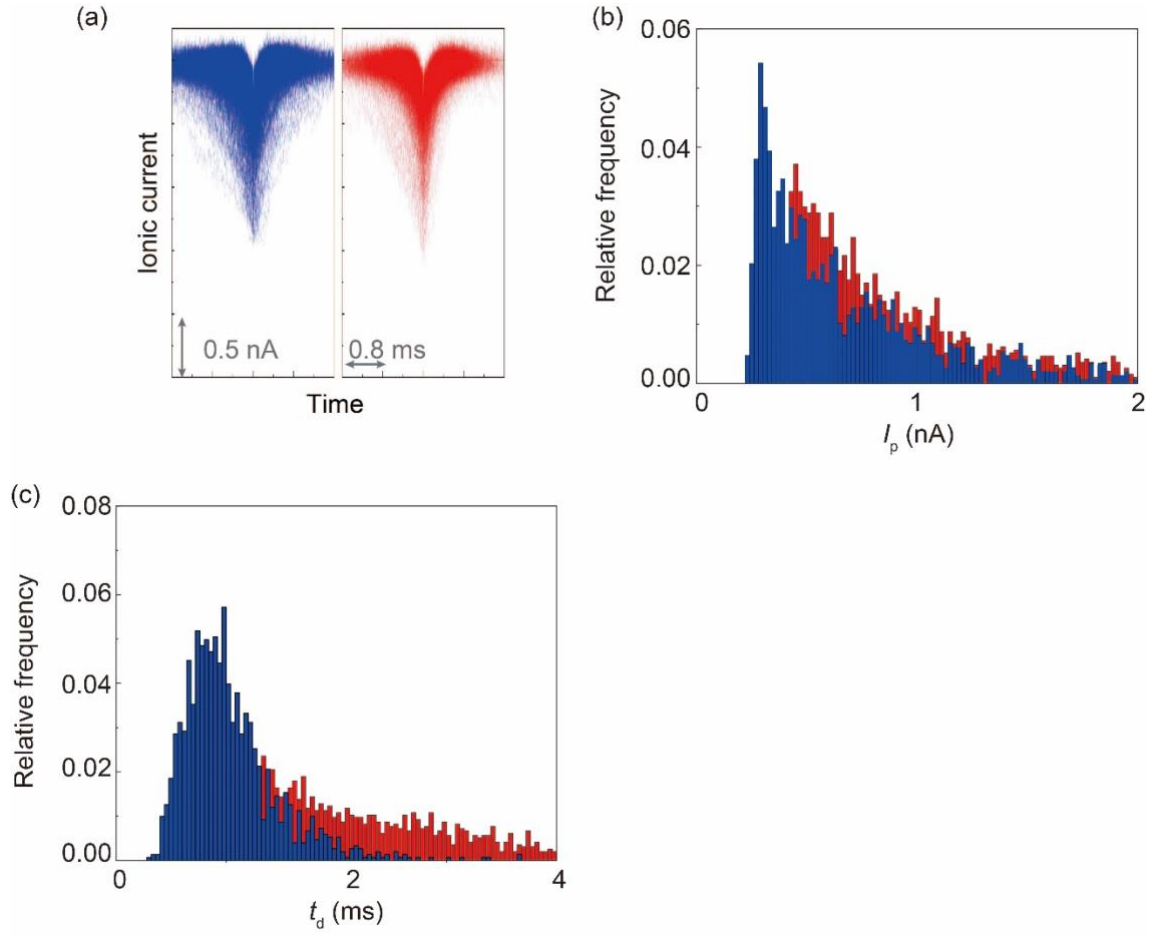

**Figure S12** Ionic current-time profiles obtained from clinical specimens. (a) One hundred superimposed ionic current-time waveforms of Wuhan- $\delta$  and Wuhan-o. Histograms of the (c) maximum current value ( $I_p$ ) and (d) current duration ( $t_d$ ). Red and blue correspond to PCR-positive and PCR-negative specimens, respectively.

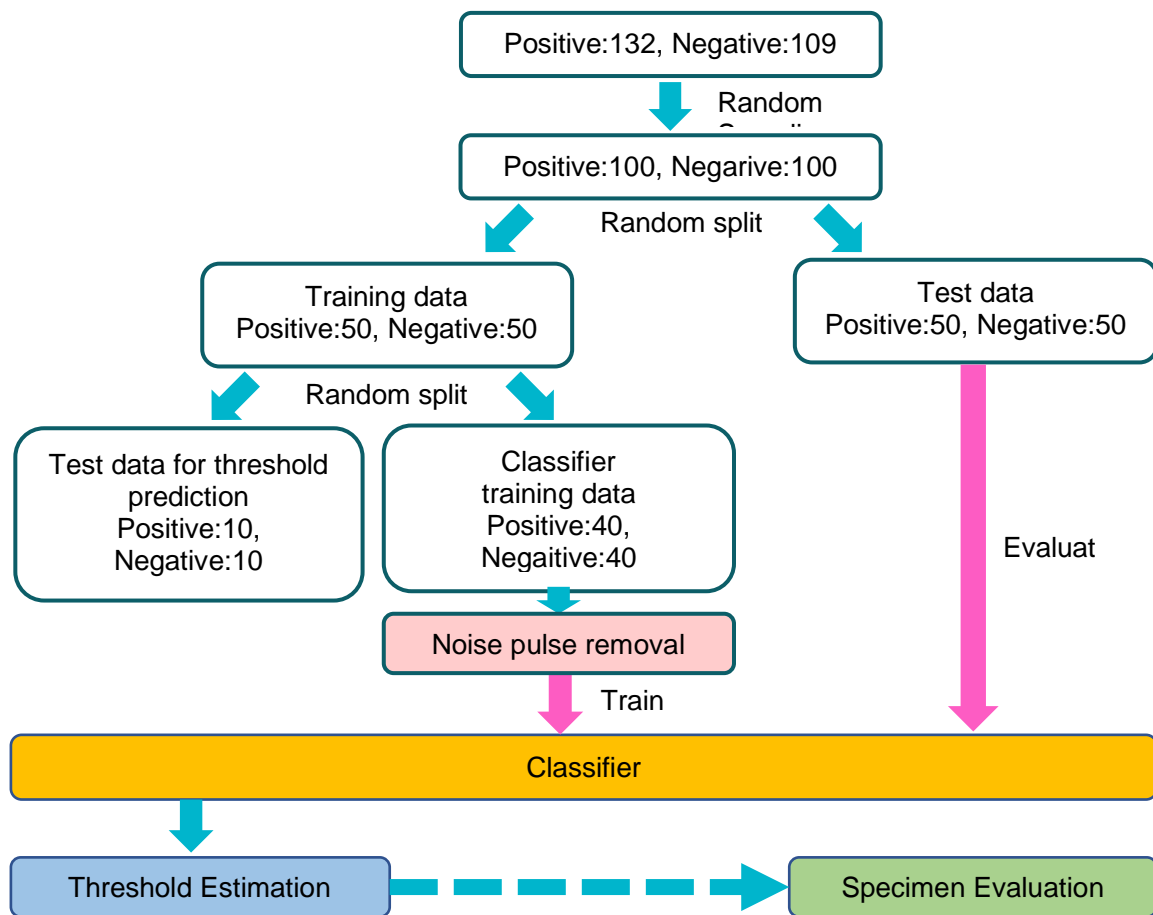

**Figure S13** Flowchart of machine learning of clinical specimens.

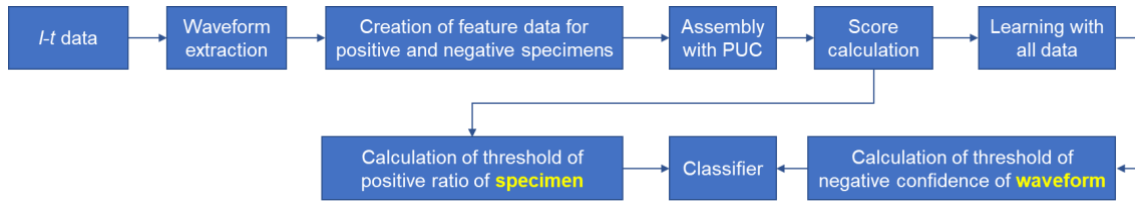

**Figure S14** Detailed algorithm of the learning process of clinical specimens. The positive ratio is the ratio of the number of positive waveforms in a specimen unit, and it is defined as the ratio between the number of waveforms judged to be positive in one specimen to the total number of waveforms in the specimen sample. A target specimen is classified as positive for the coronavirus when the positive ratio exceeds a threshold value. The negative confidence threshold is the limiting value used for each waveform, and on this basis, the negative waveform was determined by the following equation:  
 negative waveform = negative confidence of waveform > negative confidence threshold.  
 Conversely, the positive waveform was determined by the following equation:  
 positive waveform = negative confidence of waveform < negative confidence threshold.

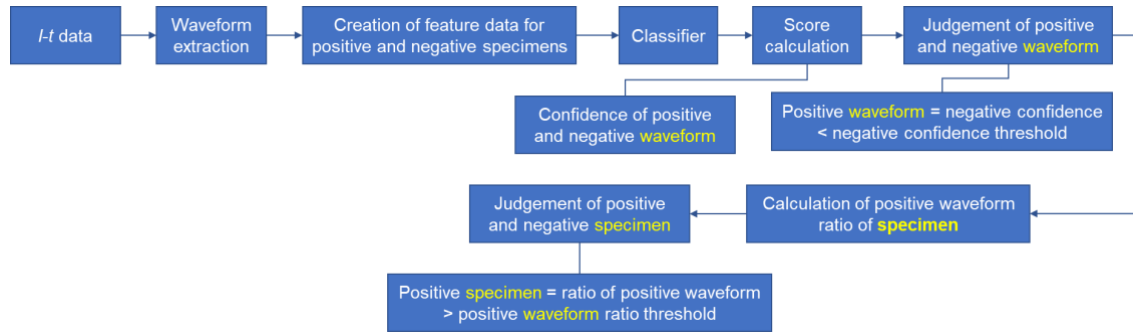

**Figure S15** Detailed algorithm of the diagnosis process of clinical specimens. The positive ratio is the ratio of the number of positive waveforms in a specimen unit, and it is defined by (the number of waveforms judged to be positive in one specimen)/(the total number of waveforms in the specimen sample). The threshold value of the positive ratio is employed to classify the target specimen as positive when the positive ratio exceeds this value. The negative confidence threshold is the confidence threshold used for each waveform. For example, the negative waveform was determined by the following logic: negative waveform = negative confidence of waveform > negative confidence threshold. In contrast, the positive waveform was determined by the following logic: positive waveform = negative confidence of waveform < negative confidence threshold.

**Table S6** Top 20 features used in machine learning for clinical specimens.

| No. | Feature                                                       |
|-----|---------------------------------------------------------------|
| 1   | matrix_profile__feature_"75"__threshold_0.98                  |
| 2   | matrix_profile__feature_"max"__threshold_0.98                 |
| 3   | length                                                        |
| 4   | fft_coefficient__attr_"abs"__coeff_99                         |
| 5   | change_quantiles__f_agg_"var"__isabs_False__qh_1.0__ql_0.0    |
| 6   | change_quantiles__f_agg_"mean"__isabs_True__qh_1.0__ql_0.0    |
| 7   | friedrich_coefficients__coeff_0__m_3__r_30                    |
| 8   | variation_coefficient                                         |
| 9   | agg_linear_trend__attr_"intercept"__chunk_len_50__f_agg_"var" |
| 10  | change_quantiles__f_agg_"mean"__isabs_True__qh_1.0__ql_0.2    |
| 11  | skewness                                                      |
| 12  | agg_autocorrelation__f_agg_"var"__maxlag_40                   |
| 13  | change_quantiles__f_agg_"var"__isabs_False__qh_1.0__ql_0.2    |
| 14  | change_quantiles__f_agg_"var"__isabs_True__qh_1.0__ql_0.0     |
| 15  | change_quantiles__f_agg_"mean"__isabs_True__qh_0.8__ql_0.0    |
| 16  | fft_coefficient__attr_"abs"__coeff_98                         |
| 17  | ar_coefficient__coeff_1__k_10                                 |
| 18  | ar_coefficient__coeff_2__k_10                                 |
| 19  | matrix_profile__feature_"25"__threshold_0.98                  |
| 20  | matrix_profile__feature_"min"__threshold_0.98                 |

**Table S7** PCR results and Ct values of clinical specimens.

|    | Learning (L)/Testing (T) | Specimen ID | PCR      | C <sub>t</sub> |
|----|--------------------------|-------------|----------|----------------|
| 1  | T                        | 0314-02+    | positive | unknown        |
| 2  | T                        | 0314-72+    | positive | unknown        |
| 3  | T                        | 0314-73+    | positive | unknown        |
| 4  | L                        | 0318K-01+   | positive | unknown        |
| 5  | L                        | 0318J-26+   | positive | unknown        |
| 6  | L                        | 0318J-29+   | positive | unknown        |
| 7  | T                        | 0324J-30+   | positive | unknown        |
| 8  | L                        | 0324J-31+   | positive | unknown        |
| 9  | L                        | 0324J-32+   | positive | unknown        |
| 10 |                          | 0324J-33+   | positive | unknown        |
| 11 | L                        | 0124-8930+  | Positive | unknown        |
| 12 | T                        | 0218-39+    | positive | unknown        |
| 13 |                          | 0219-4034+  | positive | unknown        |
| 14 | T                        | 0314J-24+   | positive | ND             |
| 15 | T                        | 0212-10+    | positive | 37.4           |
| 16 | L                        | 0224-5279+  | positive | 36.1           |
| 17 | T                        | 0311H-18+   | positive | 35.2           |
| 18 | L                        | 0228-64+    | positive | 34.59          |
| 19 | L                        | 0317-46+    | positive | 34.4           |
| 20 | T                        | 0307J-15+   | positive | 33.8           |
| 21 | T                        | 0307J-16+   | positive | 33.8           |
| 22 | L                        | 0125-27+    | Positive | 33.71          |
| 23 | T                        | 0310J-20+   | positive | 33.7           |
| 24 | T                        | 0214-90+    | positive | 33.614         |
| 25 | T                        | 0124-89+    | Positive | 33.3           |
| 26 | T                        | 0204H-02+   | positive | 33.2988        |
| 27 | T                        | 0209H-09+   | positive | 33.2           |
| 28 |                          | 0218J-03+   | positive | 33.2           |
| 29 |                          | 0228J-13+   | positive | 33             |
| 30 | T                        | 0314J-22+   | positive | 33             |
| 31 | T                        | 0302-11+    | positive | 32.9           |
| 32 | L                        | 0225J-09+   | positive | 32.8           |
| 33 | L                        | 0204-49+    | positive | 32.676         |
| 34 | L                        | 0307-08+    | positive | 32.59          |

|    |   |            |          |         |
|----|---|------------|----------|---------|
| 35 | L | 0314J-21+  | positive | 32.1    |
| 36 |   | 0214-74+   | positive | 31.992  |
| 37 | L | 0207H-07+  | positive | 31.9    |
| 38 | L | 0209-12+   | positive | 31.87   |
| 39 |   | 0219J-04+  | positive | 31.7    |
| 40 |   | 0225J-11+  | positive | 31.5    |
| 41 | T | 0131-5989+ | positive | 31.4    |
| 42 | L | 0228-40+   | positive | 31.33   |
| 43 |   | 0318H-19+  | positive | 30.7    |
| 44 | L | 0309-45+   | positive | 30.67   |
| 45 | L | 0202-47+   | positive | 30.621  |
| 46 | T | 0124-77+   | Positive | 30.25   |
| 47 |   | 0125-28+   | Positive | 29.99   |
| 48 | T | 0217-11+   | positive | 29.924  |
| 49 |   | 0228J-12+  | positive | 29.9    |
| 50 | T | 0126-50+   | Positive | 29.63   |
| 51 |   | 0309H-17+  | positive | 29.5    |
| 52 | L | 0309-81+   | positive | 29.5    |
| 53 | L | 0210-1079+ | positive | 29.3    |
| 54 | T | 0303-49+   | positive | 29.02   |
| 55 | T | 0228J-11+  | positive | 29      |
| 56 | T | 0322-56+   | positive | 28.89   |
| 57 | T | 0128-39+   | positive | 28.51   |
| 58 | T | 0204H-01+  | positive | 28.4384 |
| 59 |   | 0126-3676+ | Positive | 28.3    |
| 60 | L | 0210-93+   | positive | 27.857  |
| 61 | L | 0204H-03+  | positive | 27.8179 |
| 62 | T | 0302J-14+  | positive | 27.7    |
| 63 | L | 0124-56+   | Positive | 27.69   |
| 64 |   | 0318J-27+  | positive | 27.6    |
| 65 |   | 0207-102+  | positive | 27.57   |
| 66 | L | 0221-91+   | positive | 27.5    |
| 67 | T | 0307J-17+  | positive | 27.5    |
| 68 | T | 0202-49+   | positive | 27.481  |
| 69 |   | 0224J-08+  | positive | 27.4    |
| 70 |   | 0316-85+   | positive | 27.4    |



|     |   |            |          |        |
|-----|---|------------|----------|--------|
| 71  | L | 0210-23+   | positive | 27.33  |
| 72  | T | 0126-22+   | Positive | 27.32  |
| 73  | T | 0124-50+   | Positive | 27.25  |
| 74  | T | 0307-60+   | positive | 27.06  |
| 75  | T | 0202-42+   | positive | 26.981 |
| 76  | L | 0203-7423+ | positive | 26.9   |
| 77  | L | 0222-60+   | positive | 26.9   |
| 78  |   | 0201-52+   | positive | 26.81  |
| 79  |   | 0222-83+   | positive | 26.8   |
| 80  | L | 0209H-08+  | positive | 26.7   |
| 81  | T | 0125-85+   | Positive | 26.59  |
| 82  | T | 0310J-19+  | positive | 26.5   |
| 83  | L | 0124-49+   | Positive | 26.4   |
| 84  | L | 0318K-03+  | positive | 26.4   |
| 85  | L | 0207-8532+ | positive | 26.1   |
| 86  | L | 0212-11+   | positive | 26.1   |
| 87  |   | 0314J-23+  | positive | 26     |
| 88  |   | 0209-65+   | positive | 25.979 |
| 89  |   | 0223-03+   | positive | 25.93  |
| 90  | T | 0211H-12+  | positive | 25.9   |
| 91  | L | 0318J-25+  | positive | 25.9   |
| 92  | L | 0303-50+   | positive | 25.88  |
| 93  | L | 0218-3381+ | positive | 25.5   |
| 94  | L | 0302-87+   | positive | 25.5   |
| 95  | L | 0221J-06+  | positive | 25.3   |
| 96  | T | 0211H-11+  | positive | 25.2   |
| 97  |   | 0322-57+   | positive | 25.19  |
| 98  | L | 0128-41+   | positive | 25.1   |
| 99  |   | 0201-55+   | positive | 24.51  |
| 100 | T | 0307-57+   | positive | 24.13  |
| 101 | T | 0318J-28+  | positive | 24.1   |
| 102 |   | 0318-6+    | positive | 24     |
| 103 | L | 0214-75+   | positive | 23.902 |
| 104 | L | 0214-77+   | positive | 23.066 |
| 105 | T | 0221J-07+  | positive | 23     |
| 106 |   | 0202-85+   | positive | 22.898 |

|     |   |            |          |         |
|-----|---|------------|----------|---------|
| 107 | L | 0207-60+   | positive | 22.76   |
| 108 | L | 0322-50+   | positive | 22.53   |
| 109 | T | 0124-45+   | Positive | 22.52   |
| 110 | L | 0307-86+   | positive | 22.49   |
| 111 | L | 0204H-05+  | positive | 22.2744 |
| 112 | T | 0204H-04+  | positive | 21.8555 |
| 113 |   | 0225-5703+ | positive | 21.5    |
| 114 | T | 0127-21+   | Positive | 21.19   |
| 115 |   | 0207-64+   | positive | 21.13   |
| 116 | T | 0209H-10+  | positive | 20.1    |
| 117 | T | 0207-58+   | positive | 20.09   |
| 118 | T | 0208-85+   | positive | 19.508  |
| 119 | T | 0310J-18+  | positive | 19.3    |
| 120 | L | 0208-76+   | positive | 19.258  |
| 121 |   | 0207H-06+  | positive | 19      |
| 122 | L | 0207-103+  | positive | 18.83   |
| 123 | T | 0203-29+   | positive | 18.673  |
| 124 | L | 0126-52+   | Positive | 18.1    |
| 125 | T | 0217-10+   | positive | 17.796  |
| 126 | L | 0318K-02+  | positive | 17.7    |
| 127 | L | 0218J-02+  | positive | 17.1    |
| 128 |   | 0221-02+   | positive | 16.8    |
| 129 |   | 0209-66+   | positive | 16.747  |
| 130 | T | 0209-60+   | positive | 16.053  |
| 131 | T | 0121-6493+ | Positive | 15.32   |
| 132 | L | 0221H-14+  | positive | 14.8    |
| 133 |   | 0218H-14+  | positive | 14.4    |
| 134 | T | 0122MM     | Negative |         |
| 135 | L | 0122MW     | Negative |         |
| 136 | L | 0122SK     | Negative |         |
| 137 |   | 0124YT     | Negative |         |
| 138 | T | 0124TS     | Negative |         |
| 139 | T | 0124SO     | Negative |         |
| 140 | T | 0125-44    | Negative |         |
| 141 |   | 0125-47    | Negative |         |
| 142 | T | 0125-48    | Negative |         |

|     |   |         |          |
|-----|---|---------|----------|
| 143 | L | 0125-53 | Negative |
| 144 | T | 0125-54 | Negative |
| 145 | T | 0126-29 | Negative |
| 146 | T | 0126-25 | Negative |
| 147 |   | 0126-31 | Negative |
| 148 | T | 0126-53 | Negative |
| 149 | T | 0126-55 | Negative |
| 150 | T | 0127-2  | Negative |
| 151 | T | 0127-3  | Negative |
| 152 | T | 0127-4  | Negative |
| 153 | L | 0127-9  | Negative |
| 154 |   | 0127-10 | Negative |
| 155 | T | 0128-4  | Negative |
| 156 | T | 0128-14 | Negative |
| 157 | L | 0128-21 | Negative |
| 158 | T | 0128-40 | Negative |
| 159 | T | 0128-44 | Negative |
| 160 | T | 0131-3  | negative |
| 161 | L | 0131-6  | negative |
| 162 | T | 0131-33 | negative |
| 163 |   | 0131-37 | negative |
| 164 | T | 0131-63 | negative |
| 165 | L | 0203-5  | negative |
| 166 | L | 0203-6  | negative |
| 167 | T | 0203-7  | negative |
| 168 |   | 0203-15 | negative |
| 169 | L | 0203-16 | negative |
| 170 | T | 0204-39 | negative |
| 171 | L | 0204-42 | negative |
| 172 | L | 0204-45 | negative |
| 173 | L | 0204-46 | negative |
| 174 | T | 0204-54 | negative |
| 175 | L | 0208-11 | negative |
| 176 | T | 0208-22 | negative |
| 177 |   | 0208-39 | negative |
| 178 | T | 0208-40 | negative |

|     |   |            |          |
|-----|---|------------|----------|
| 179 | T | 0208-45    | negative |
| 180 | L | 0210-24    | negative |
| 181 | L | 0210-32    | negative |
| 182 | T | 0210-55    | negative |
| 183 | T | 0210-73    | negative |
| 184 | L | 0210-87    | negative |
| 185 |   | 0214-14    | negative |
| 186 | T | 0214-15    | negative |
| 187 | L | 0214-31    | negative |
| 188 | L | 0215-24    | negative |
| 189 | T | 0215-96    | negative |
| 190 | L | 0215-26    | negative |
| 191 | L | 0215-29    | negative |
| 192 |   | 0215-30    | negative |
| 193 | L | 0215-25    | negative |
| 194 | T | 0216-25    | negative |
| 195 | L | 0216-27    | negative |
| 196 | L | 0216-50    | negative |
| 197 | T | 0216-51    | negative |
| 198 | L | 0216-53    | negative |
| 199 | T | 0217-12    | negative |
| 200 | T | 0217-13    | negative |
| 201 | L | 0217-14    | negative |
| 202 | T | 0217-17    | negative |
| 203 | L | 0217-18    | negative |
| 204 | L | 0217-36    | negative |
| 205 | L | 0217-44    | negative |
| 206 | L | 0217-54    | negative |
| 207 | L | 0217-55    | negative |
| 208 |   | 0217-56    | negative |
| 209 | L | 0218H-13+  | negative |
| 210 | L | 0218J-01+  | negative |
| 211 | T | 0219-4021+ | negative |
| 212 | L | 0219J-05+  | negative |
| 213 | L | 0221-06    | negative |
| 214 | L | 0221-04    | negative |

|     |   |           |          |
|-----|---|-----------|----------|
| 215 | L | 0221-09   | negative |
| 216 | T | 0221-11   | negative |
| 217 | L | 0221-20   | negative |
| 218 | T | 0221-46   | negative |
| 219 | T | 0221-48   | negative |
| 220 | L | 0221H-15+ | negative |
| 221 | T | 0222-16   | negative |
| 222 | L | 0222-23   | negative |
| 223 | L | 0222-26   | negative |
| 224 | L | 0222-28   | negative |
| 225 | T | 0222-31   | negative |
| 226 | T | 0222-32   | negative |
| 227 | T | 0222-37   | negative |
| 228 | L | 0222-47   | negative |
| 229 | T | 0222-48   | negative |
| 230 | L | 0222-50   | negative |
| 231 | L | 0224-24   | negative |
| 232 | L | 0224-05   | negative |
| 233 | T | 0224-06   | negative |
| 234 | T | 0224-09   | negative |
| 235 | L | 0224-10   | negative |
| 236 | L | 0224-14   | negative |
| 237 | T | 0224-17   | negative |
| 238 | T | 0224-22   | negative |
| 239 | T | 0224-34   | negative |
| 240 | L | 0224-49   | negative |
| 241 | L | 0125-28+2 | Positive |

---

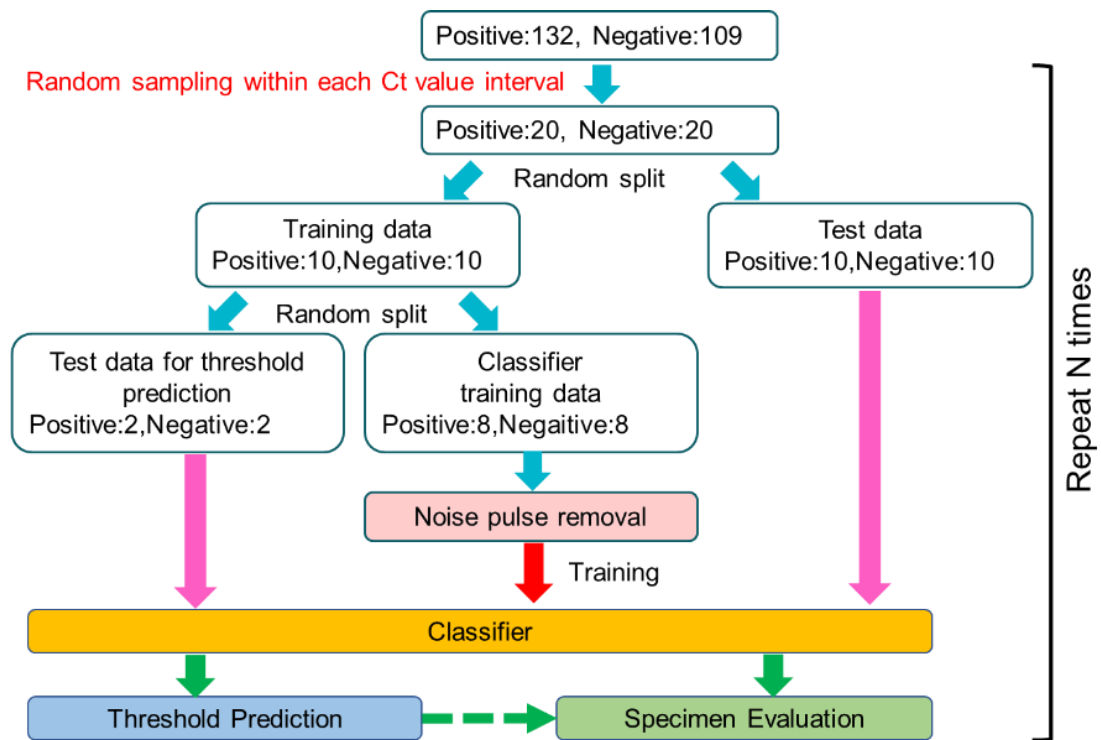

**Figure S16** Analysis procedure for the  $C_t$  dependence of the  $F$ -measures, sensitivity, and specificity. Separate specimens for each  $C_t$  value were used to train and evaluate the classifiers.

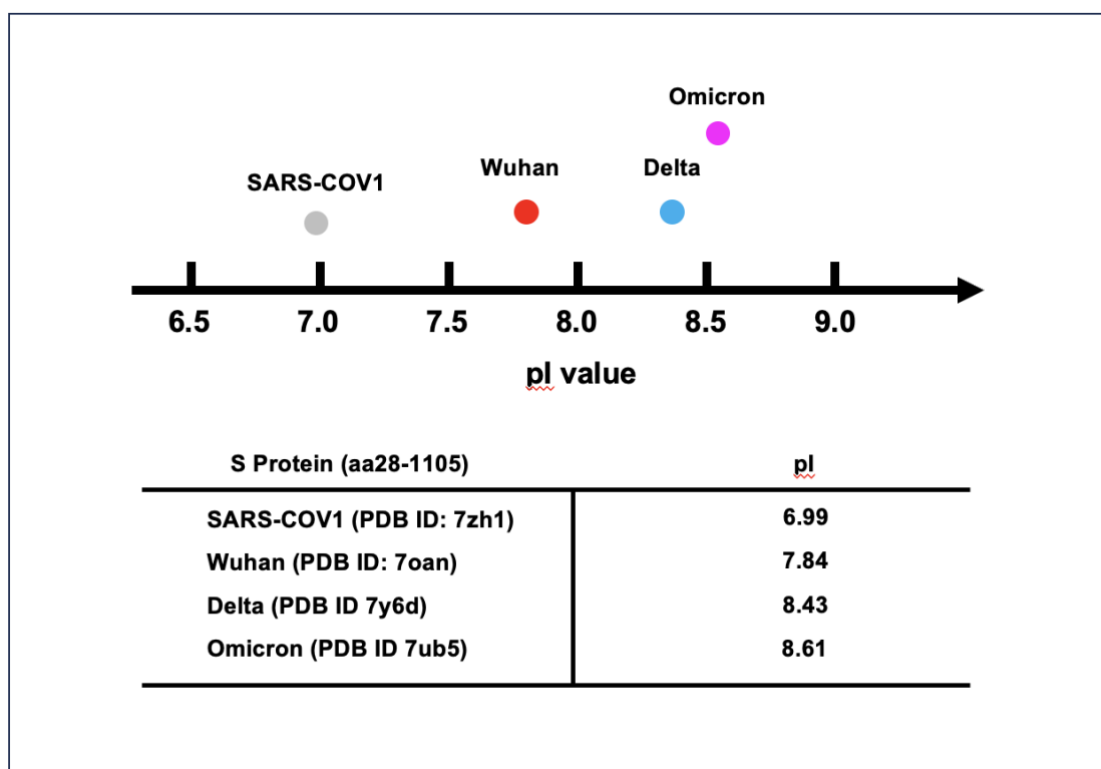

**Figure S17** Isoelectric points of S-proteins on different coronaviruses.

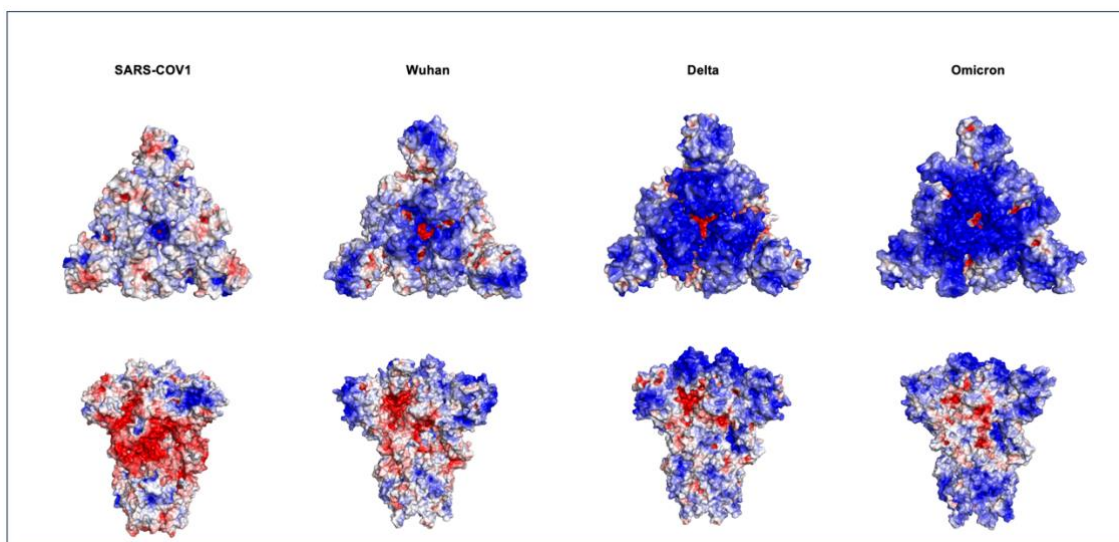

**Figure S18** Electrostatic potentials of S-proteins on different coronaviruses.
